# Supplementary material for: Isoprenylated Flavonoids and 2-Arylbenzofurans from the Root Bark of Morus alba L. and Their Cytotoxic Activity against HGC27 Cancer Cells
Source: MDPI journal article supplement (doi:10.3390/molecules29010030), 2023-12-20
Supplement: s1 [file s1]

# Isoprenylated Flavonoids and 2-arylbenzofurans from the Root Bark of *Morus alba* L. and Their Cytotoxic Activity against HGC27 Cancer Cells

Hang-Yi Pu <sup>1,2</sup>, Dong-Yi Cao <sup>3</sup>, Xue Zhou <sup>1,2</sup>, Fu Li <sup>1,2</sup>, Lun Wang <sup>1,2</sup> and Ming-Kui Wang <sup>1,2,\*</sup>

<sup>1</sup> Natural Products Research Center, Chengdu Institute of Biology, Chinese Academy of Sciences, Chengdu 610041, China; puhangyi18@mails.ucas.ac.cn (H.-Y.P.); zhouxue22@mails.ucas.ac.cn (X.Z.); lifu@cib.ac.cn (F.L.); wanglun@cib.ac.cn (L.W.)

<sup>2</sup> Chengdu Institute of Biology, University of Chinese Academy of Sciences, Beijing 100049, China

<sup>3</sup> Pharmaceutical Department, The Third Affiliated Hospital of Yunnan University of Chinese Medicine, Kunming 650500, China; cdy1992126@126.com

\* Correspondence: wangmk@cib.ac.cn; Tel. /Fax: +86-28-82890821

## Supporting Information Available

**Figure S1.** HR-ESI-MS spectrum of compound **1**.

**Figure S2.**  $^1\text{H}$ -NMR spectrum (400 MHz,  $\text{CD}_3\text{OD}$ ) of compound **1**.

**Figure S3.**  $^{13}\text{C}$ -NMR (100 MHz,  $\text{CD}_3\text{OD}$ ) spectrum of compound **1**.

**Figure S4.** DEPT 135 spectrum (100 MHz,  $\text{CD}_3\text{OD}$ ) of compound **1**.

**Figure S5.** HSQC spectrum of compound **1** in  $\text{CD}_3\text{OD}$ .

**Figure S6.** HMBC spectrum of compound **1** in  $\text{CD}_3\text{OD}$ .

**Figure S7.**  $^1\text{H}$ - $^1\text{H}$  COSY spectrum of compound **1** in  $\text{CD}_3\text{OD}$ .

**Figure S8.** NOSEY spectrum of compound **1** in  $\text{CD}_3\text{OD}$ .

**Figure S9.** HR-ESI-MS spectrum of compound **11**.

**Figure S10.**  $^1\text{H}$ -NMR spectrum (600 MHz, DMSO) of compound **11**.

**Figure S11.**  $^{13}\text{C}$ -NMR (150 MHz, DMSO) spectrum of compound **11**.

**Figure S12.** DEPT 135 spectrum (150 MHz, DMSO) of compound **11**.

**Figure S13.** HSQC spectrum of compound **11** in DMSO.

**Figure S14.** HMBC spectrum of compound **11** in DMSO.

**Figure S15.**  $^1\text{H}$ - $^1\text{H}$  COSY spectrum of compound **11** in DMSO.

**Figure S16.** HR-ESI-MS spectrum of compound **12**.

**Figure S17.**  $^1\text{H}$ -NMR spectrum (600 MHz,  $\text{CD}_3\text{OD}$ ) of compound **12**.

**Figure S18.**  $^{13}\text{C}$ -NMR spectrum (150 MHz,  $\text{CD}_3\text{OD}$ ) of compound **12**.

**Figure S19.** DEPT 135 spectrum (150 MHz,  $\text{CD}_3\text{OD}$ ) of compound **12**.

**Figure S20.** HSQC spectrum of compound **12** in  $\text{CD}_3\text{OD}$ .

**Figure S21.** HMBC spectrum of compound **12** in  $\text{CD}_3\text{OD}$ .

**Figure S22.**  $^1\text{H}$ - $^1\text{H}$  COSY spectrum of compound **12** in  $\text{CD}_3\text{OD}$ .

**Figure S23.**  $^1\text{H}$ -NMR spectrum (600 MHz, DMSO) of compound **12**.

**Figure S24.**  $^{13}\text{C}$ -NMR (150 MHz, DMSO) spectrum of compound **12**.

**Figure S25.** DEPT 135 spectrum (150 MHz, DMSO) of compound **12**.

Item name: 20200610-PXY-SPB-12

Channel name: Time 0.0683 +/- 0.0500 minutes

Item description:

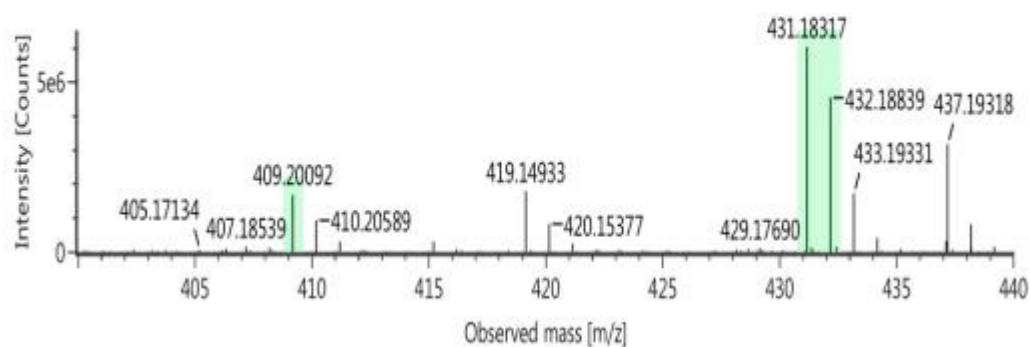

Figure S1. HR-ESI-MS spectrum of compound 1.

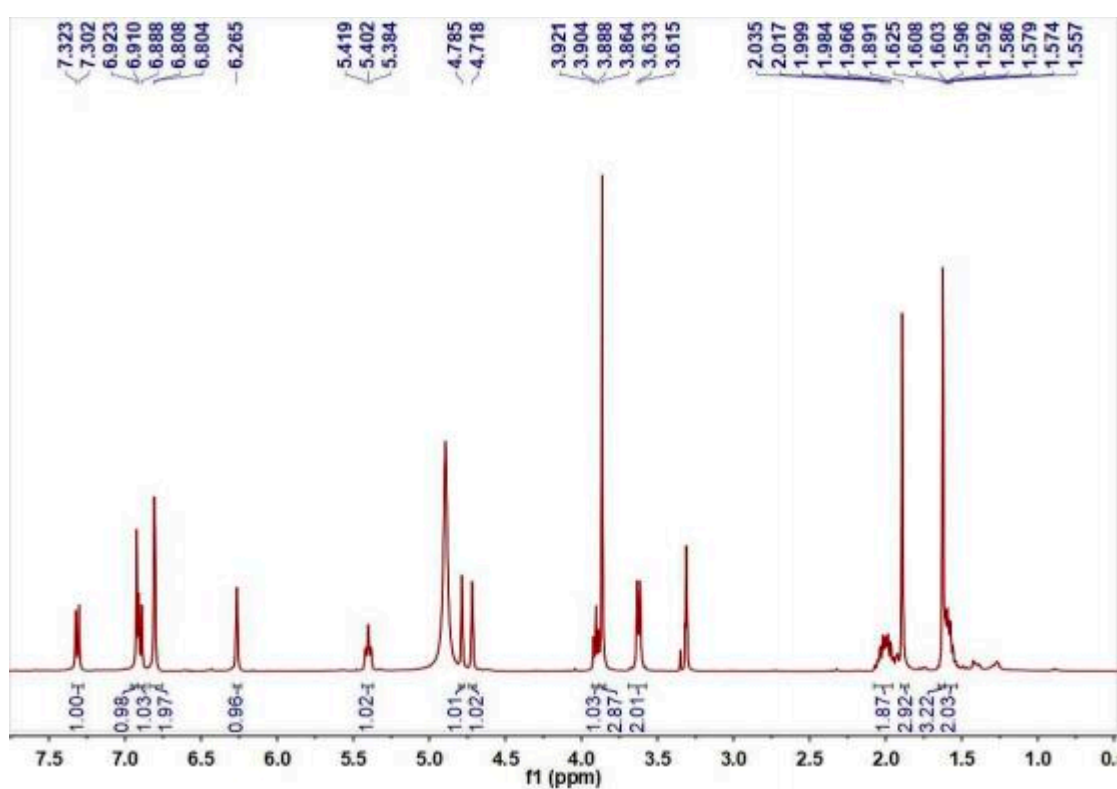

Figure S2. <sup>1</sup>H-NMR spectrum (400 MHz, CD<sub>3</sub>OD) of compound 1.

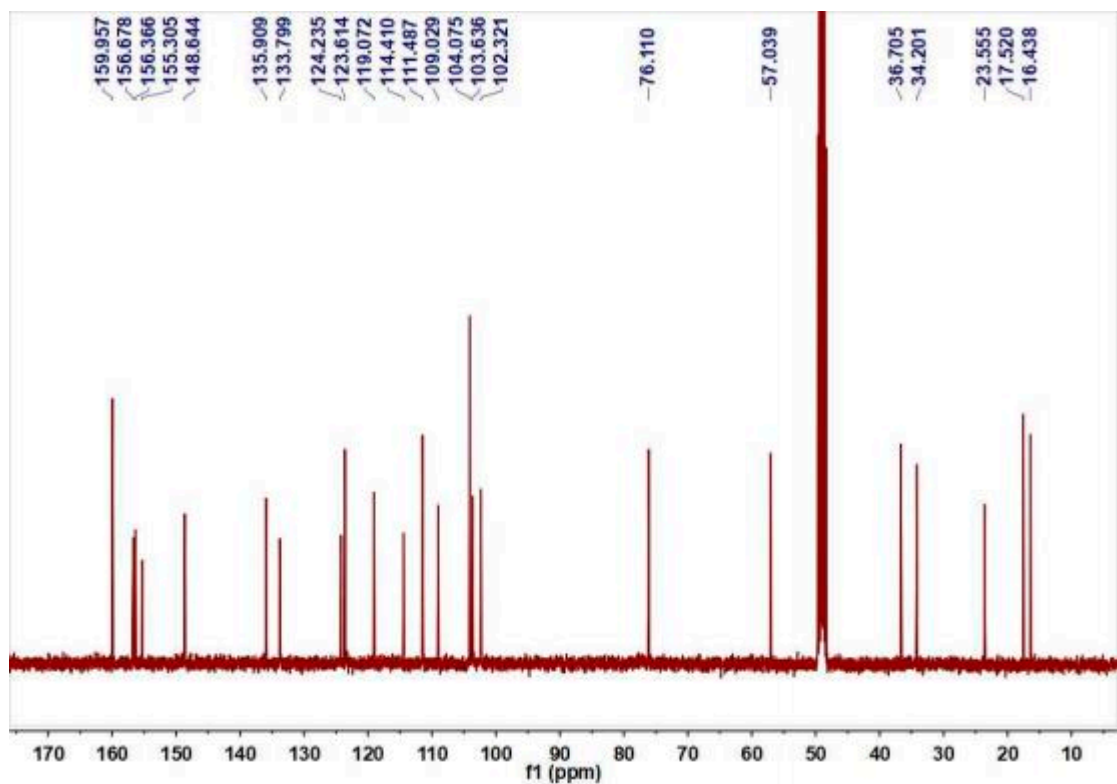

Figure S3.  $^{13}\text{C}$ -NMR (100 MHz,  $\text{CD}_3\text{OD}$ ) spectrum of compound 1.

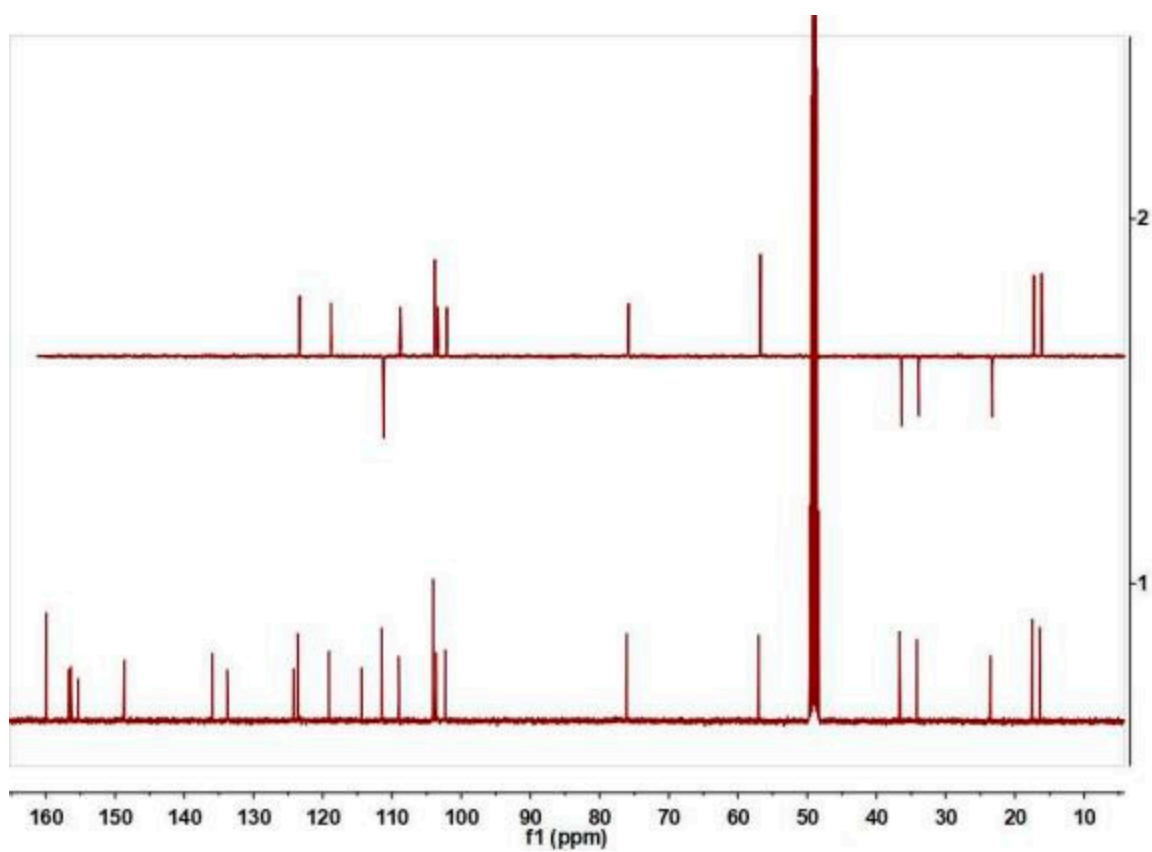

Figure S4. DEPT 135 spectrum (100 MHz,  $\text{CD}_3\text{OD}$ ) of compound 1.

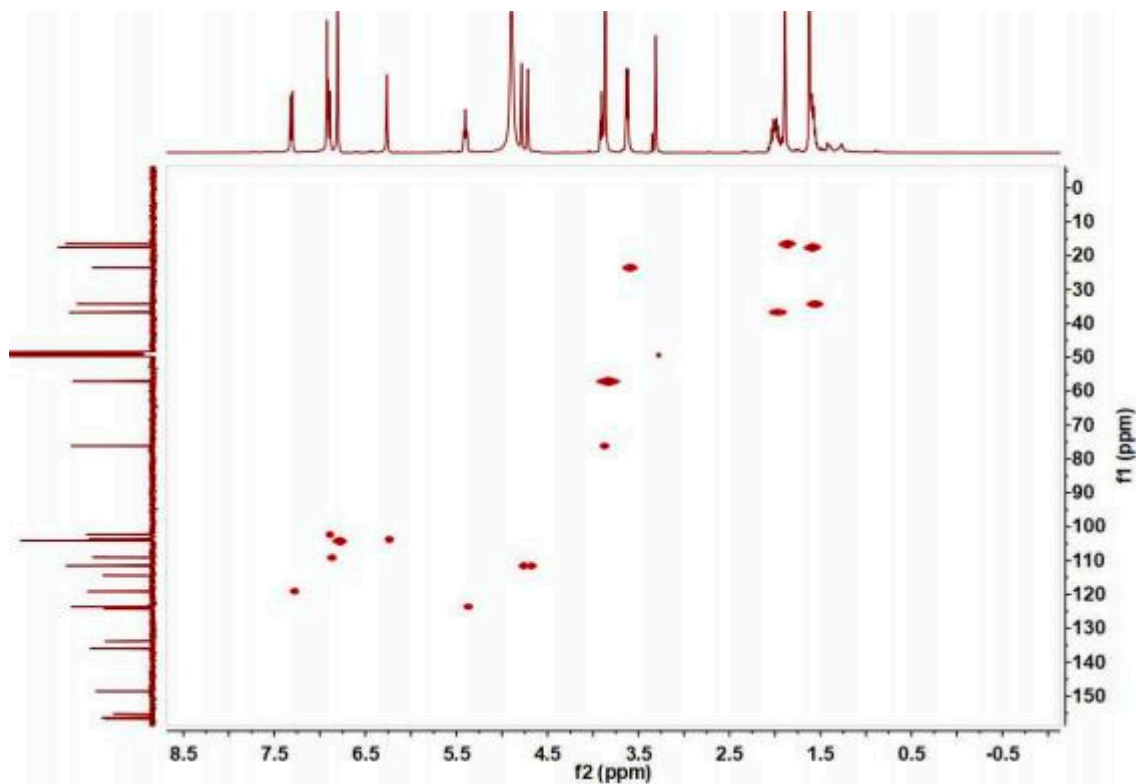

Figure S5. HSQC spectrum of compound **1** in CD<sub>3</sub>OD.

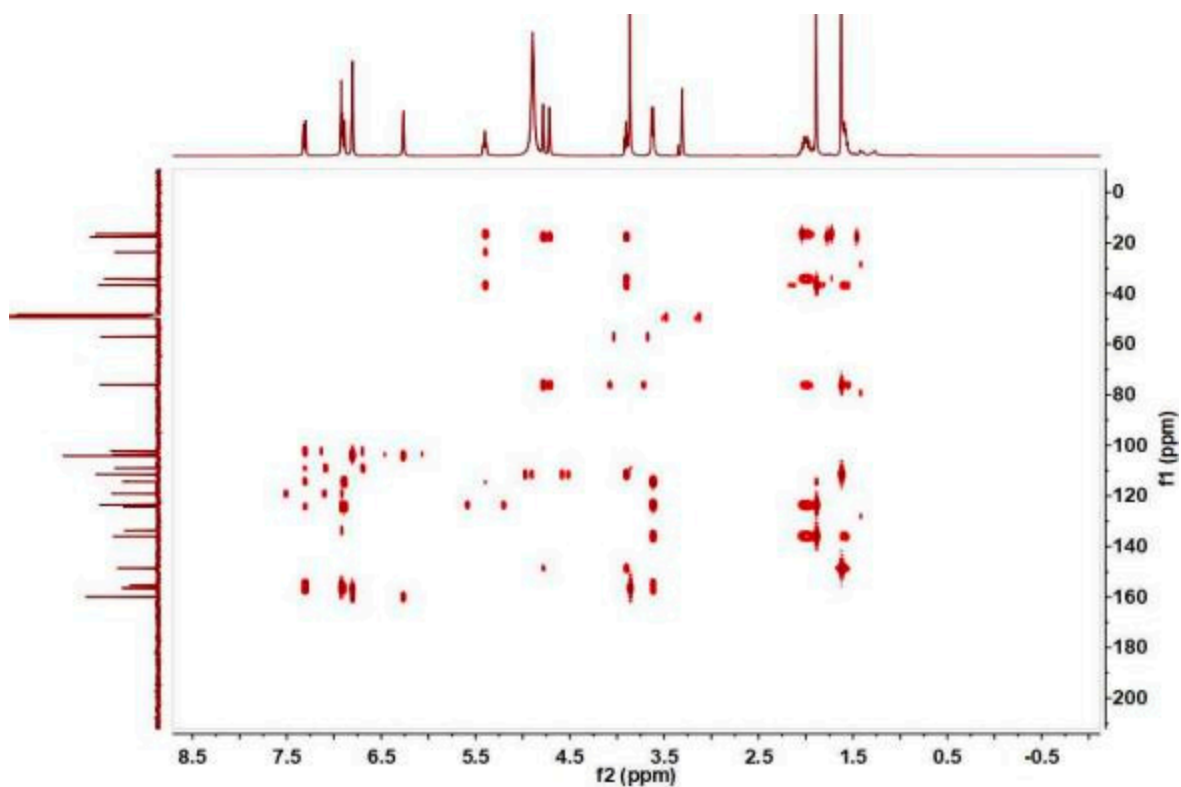

Figure S6. HMBC spectrum of compound **1** in CD<sub>3</sub>OD.

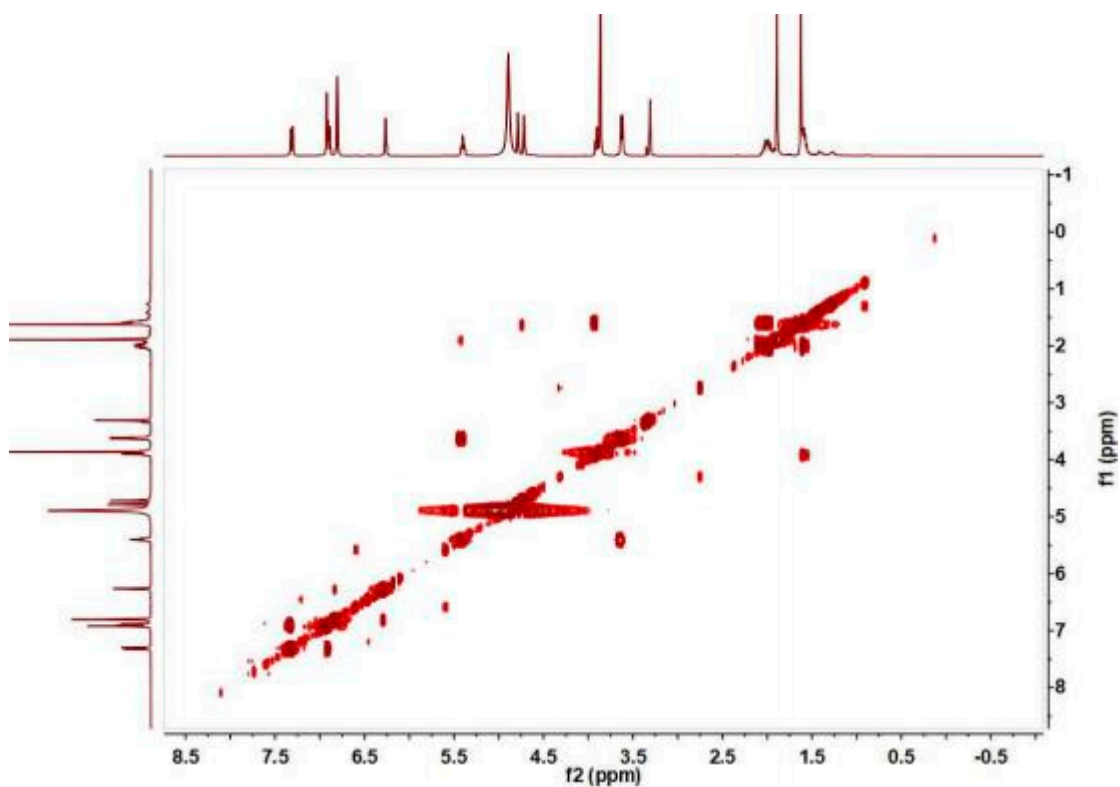

Figure S7.  $^1\text{H}$ - $^1\text{H}$  COSY spectrum of compound **1** in  $\text{CD}_3\text{OD}$ .

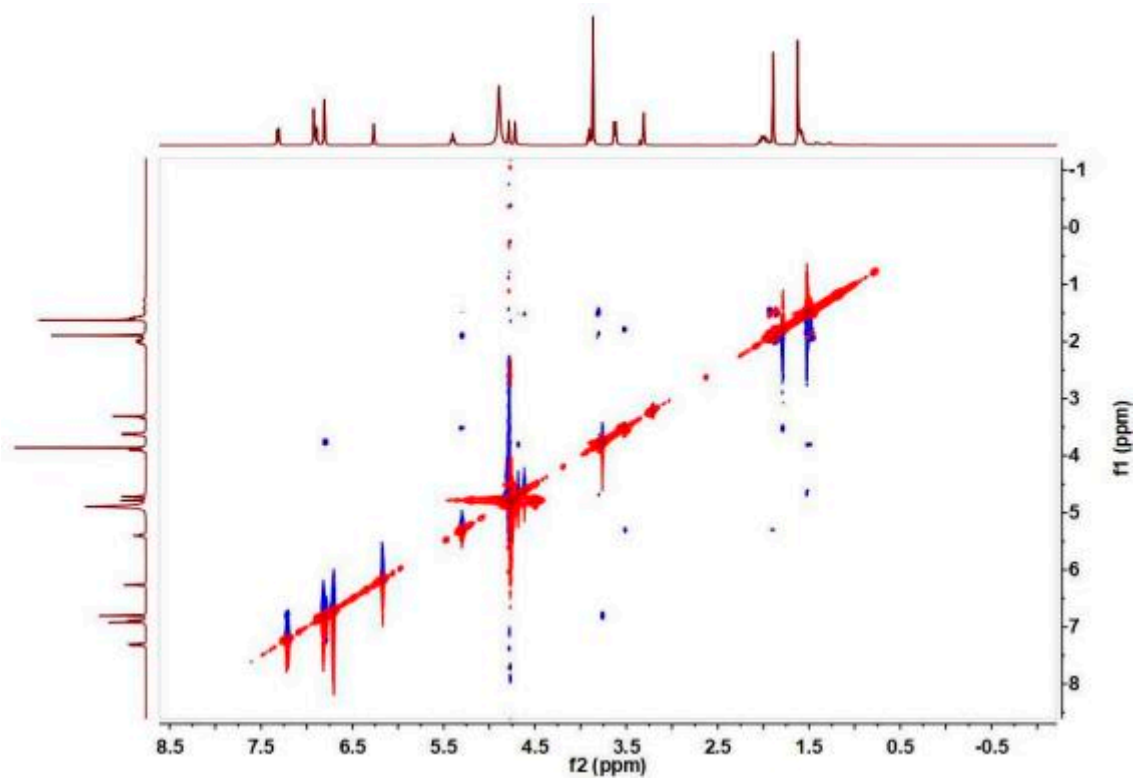

Figure S8. NOESY spectrum of compound **1** in  $\text{CD}_3\text{OD}$ .

Item name: 20220620-PXY-SBP-11-1

Channel name: Time 0.1343 +/- 0.0500 minutes

Item description:

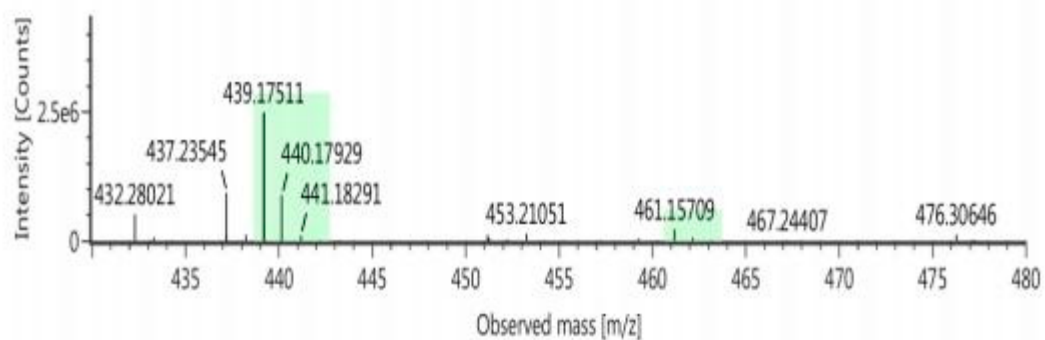

Figure S9. HR-ESI-MS spectrum of compound 11.

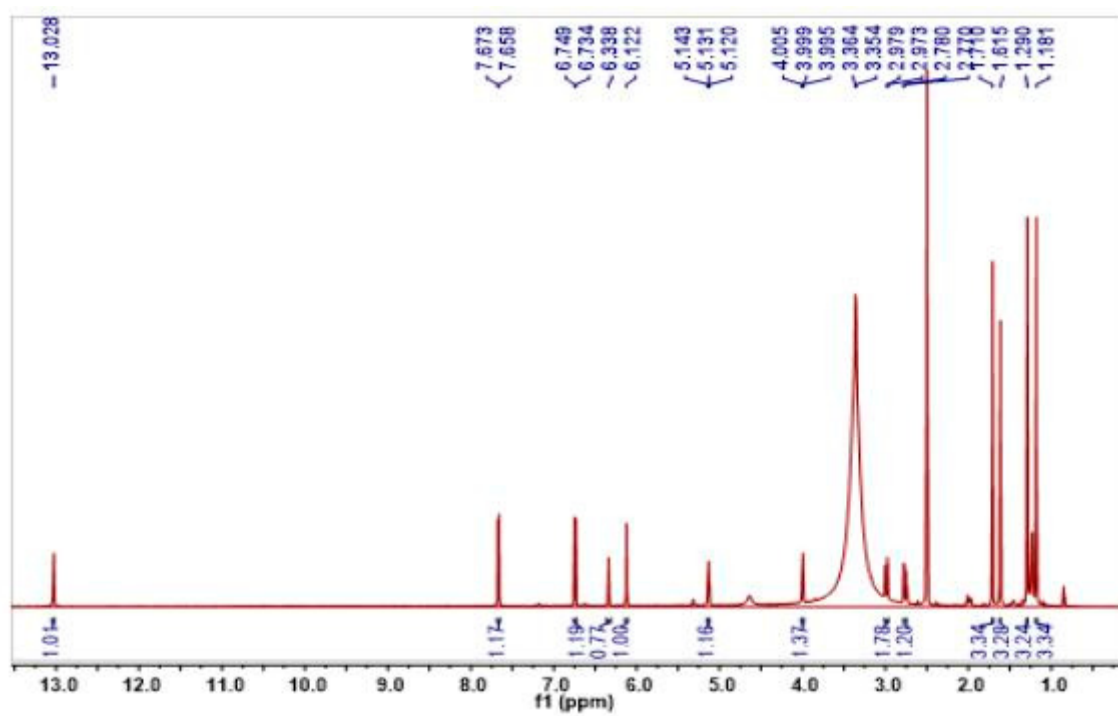

Figure S10. <sup>1</sup>H-NMR spectrum (600 MHz, DMSO) of compound 11.

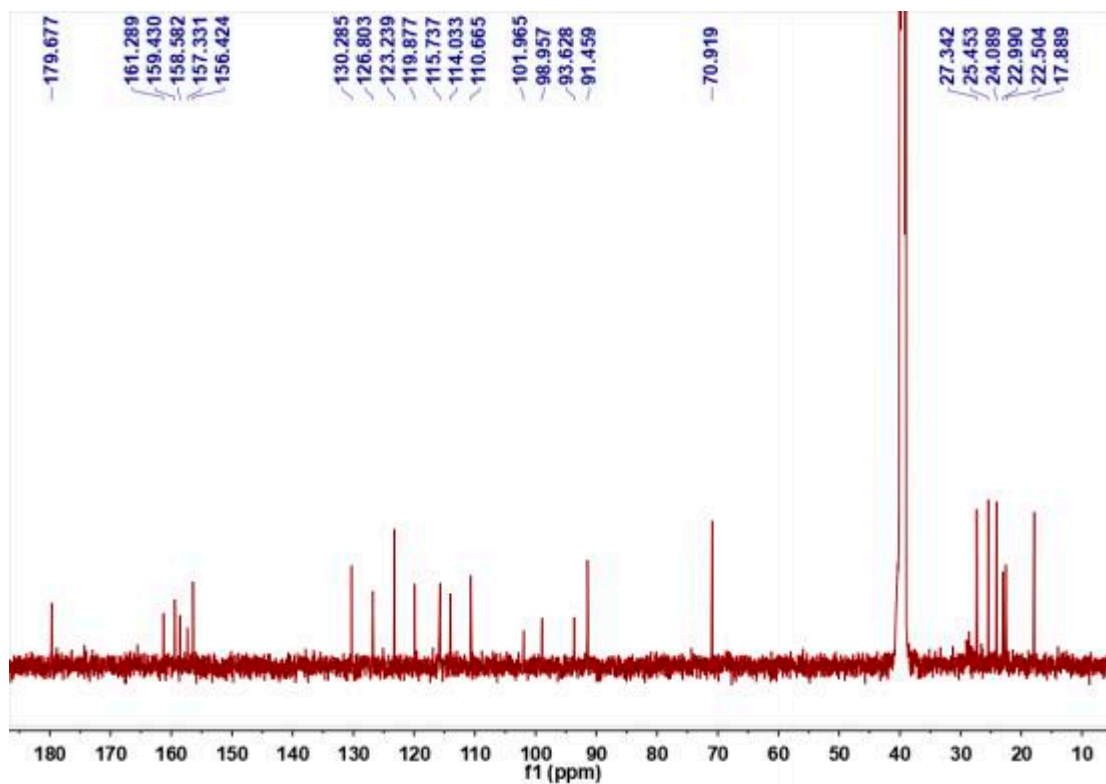

Figure S11.  $^{13}\text{C}$ -NMR (150 MHz, DMSO) spectrum of compound 11.

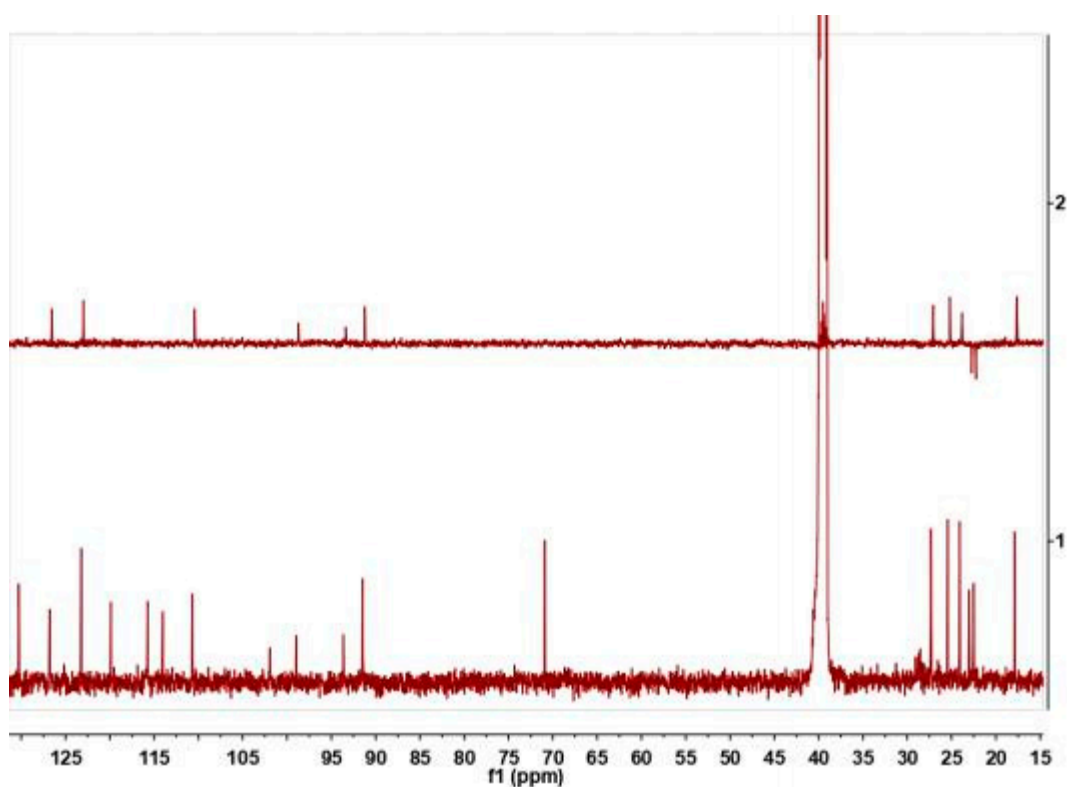

Figure S12. DEPT 135 spectrum (150 MHz, DMSO) of compound 11.



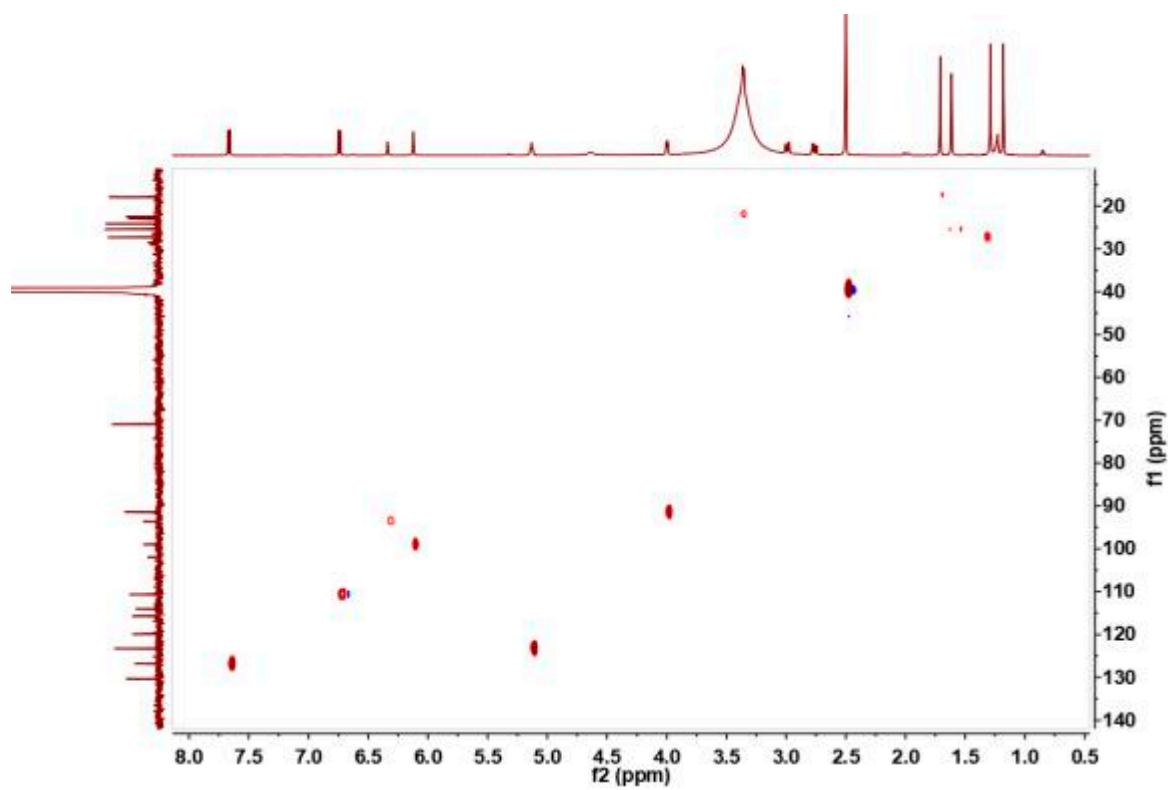

Figure S13. HSQC spectrum of compound **11** in DMSO.

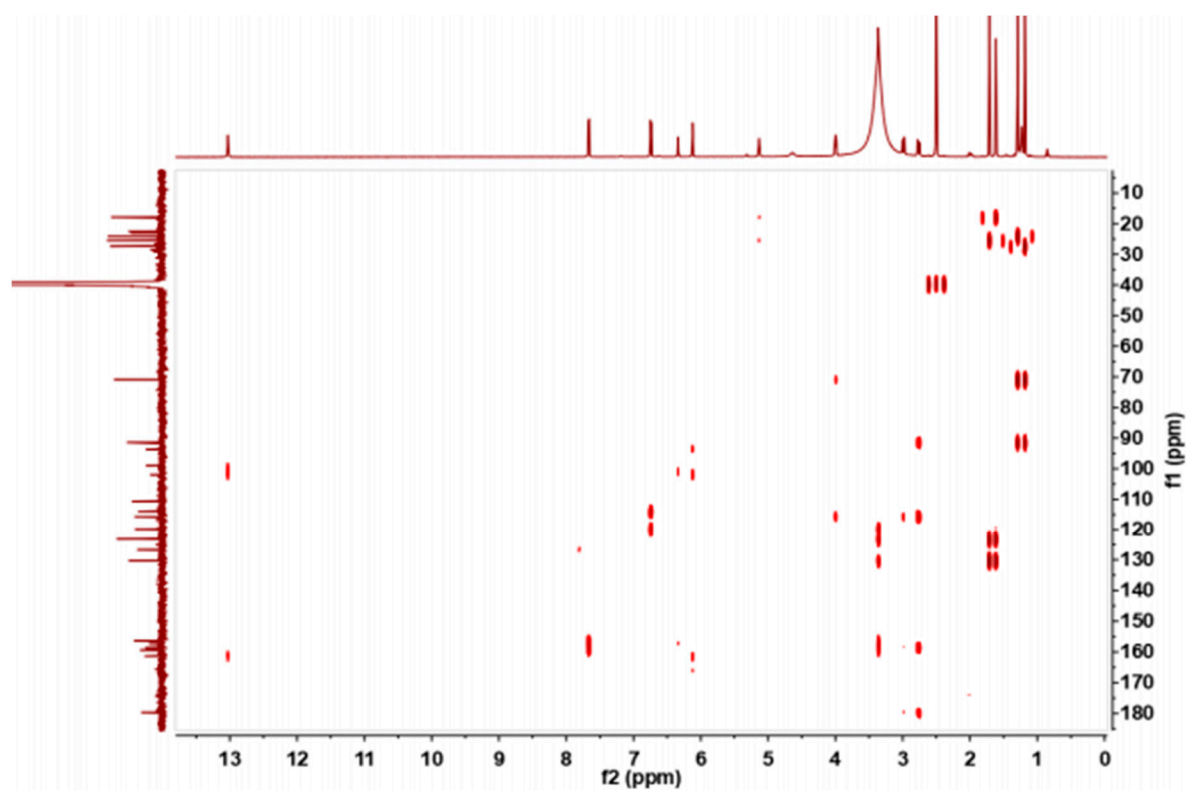

Figure S14. HMBC spectrum of compound **11** in DMSO.

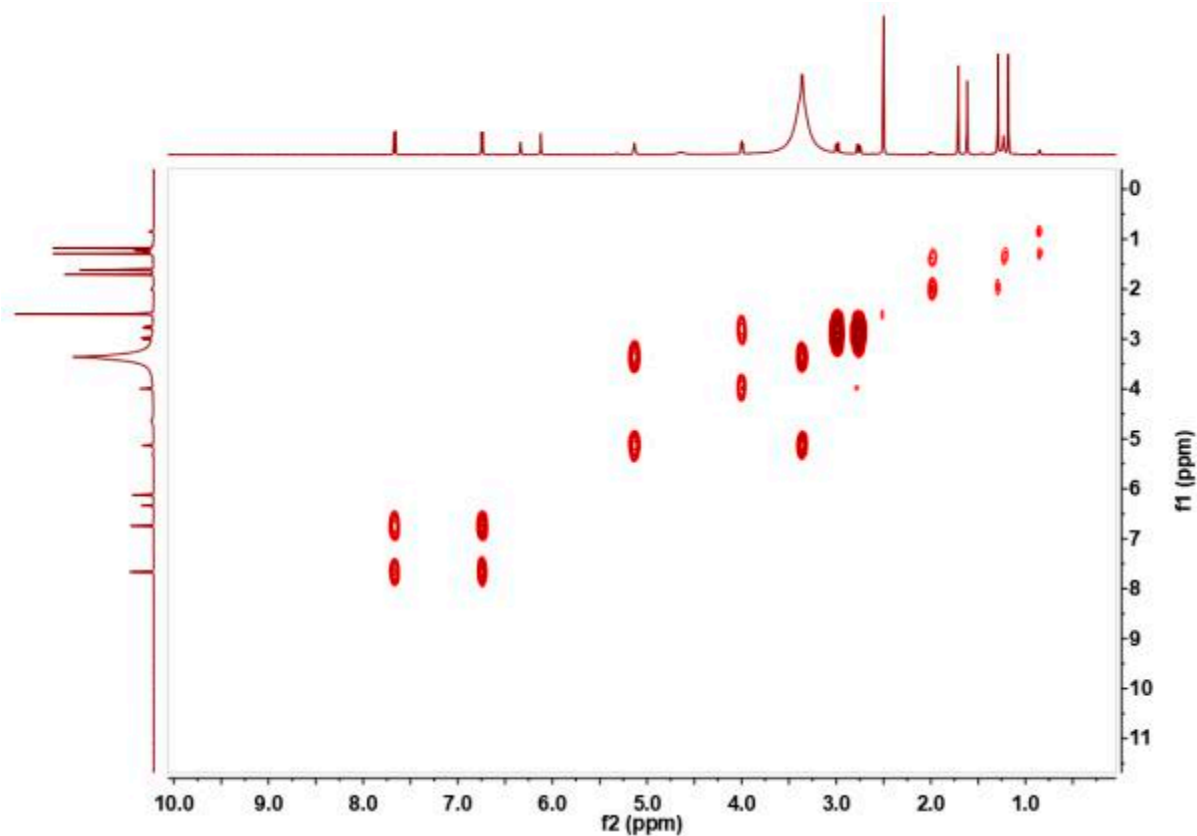

**Figure S15.**  $^1\text{H}$ - $^1\text{H}$  COSY spectrum of compound **11** in DMSO.

Item name: 20220620-PXY-SBP-11-2

Channel name: Time 0.1308 +/- 0.0500 minutes

Item description:

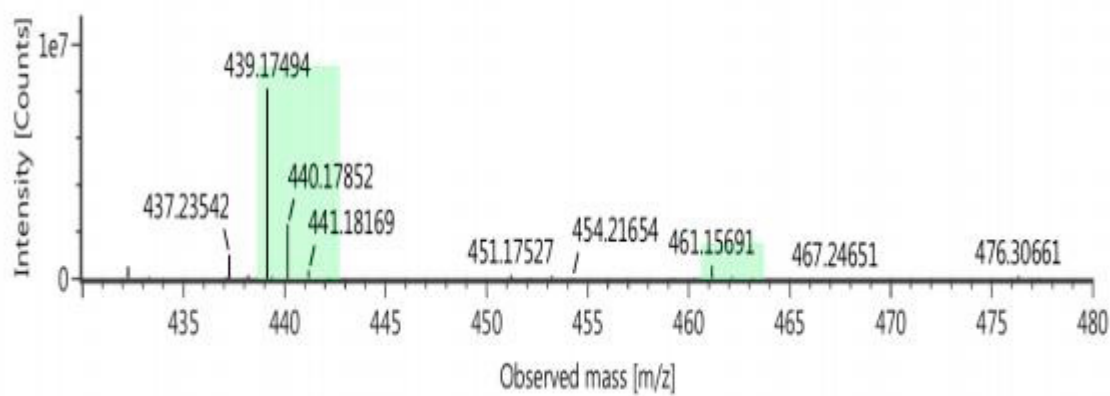

**Figure S16.** HR-ESI-MS spectrum of compound **12**.

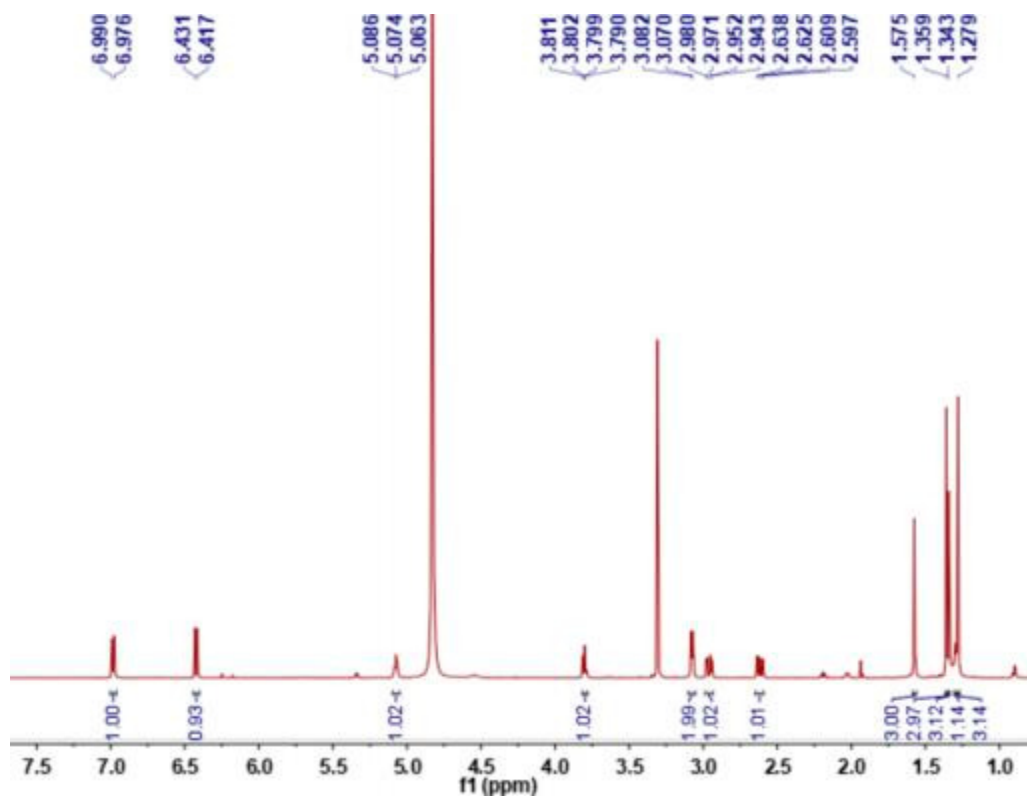

Figure S17.  $^1\text{H}$ -NMR spectrum (600 MHz,  $\text{CD}_3\text{OD}$ ) of compound 12.

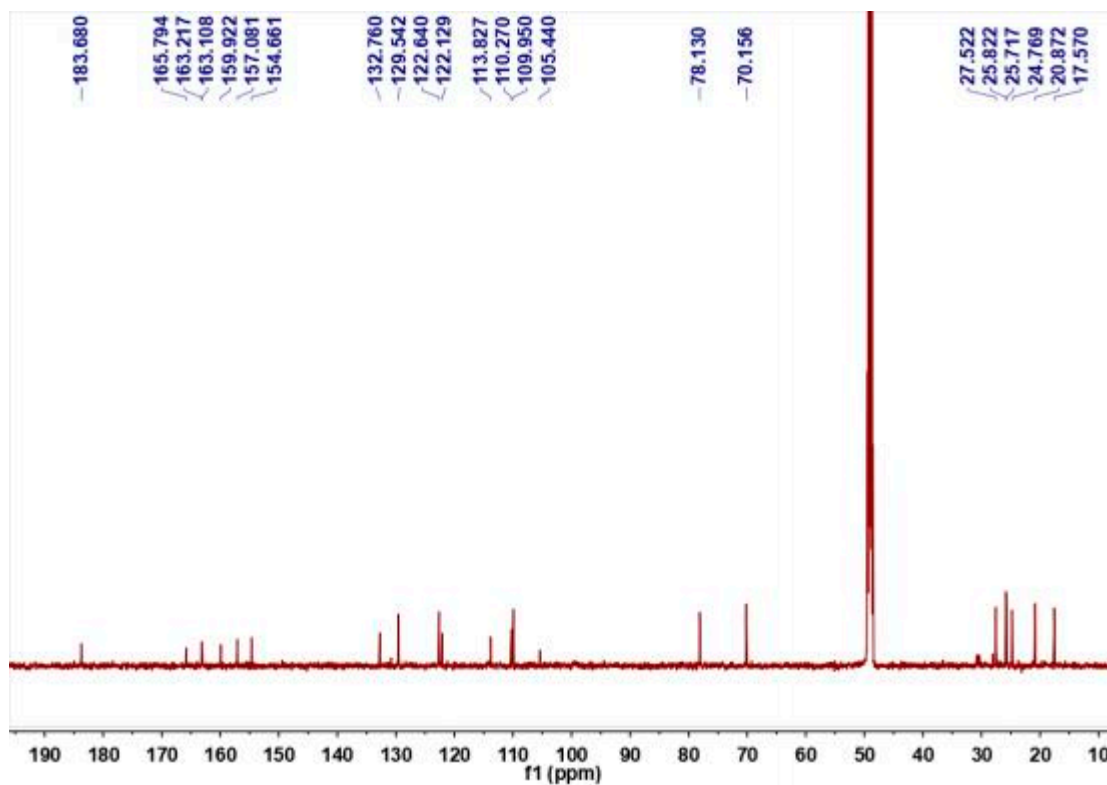

Figure S18.  $^{13}\text{C}$ -NMR spectrum (150 MHz,  $\text{CD}_3\text{OD}$ ) of compound 12.

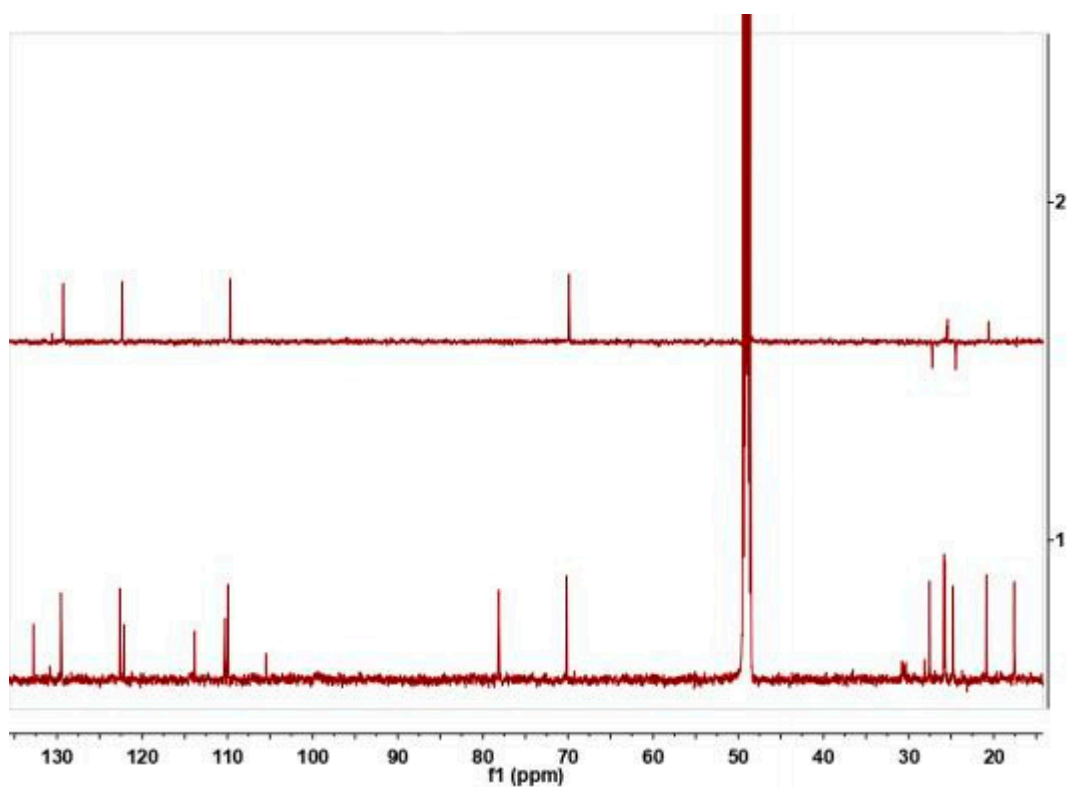

Figure S19. DEPT 135 spectrum (150 MHz, CD<sub>3</sub>OD) of compound 12.

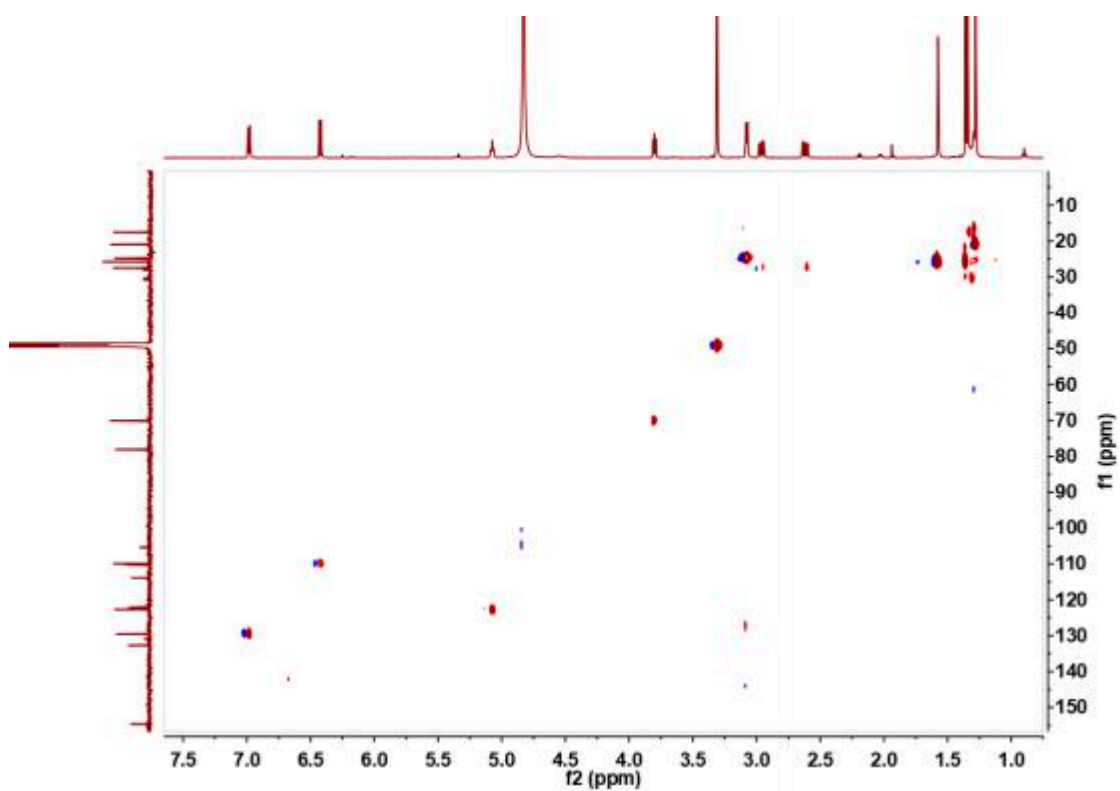

Figure S20. HSQC spectrum of compound 12 in CD<sub>3</sub>OD.

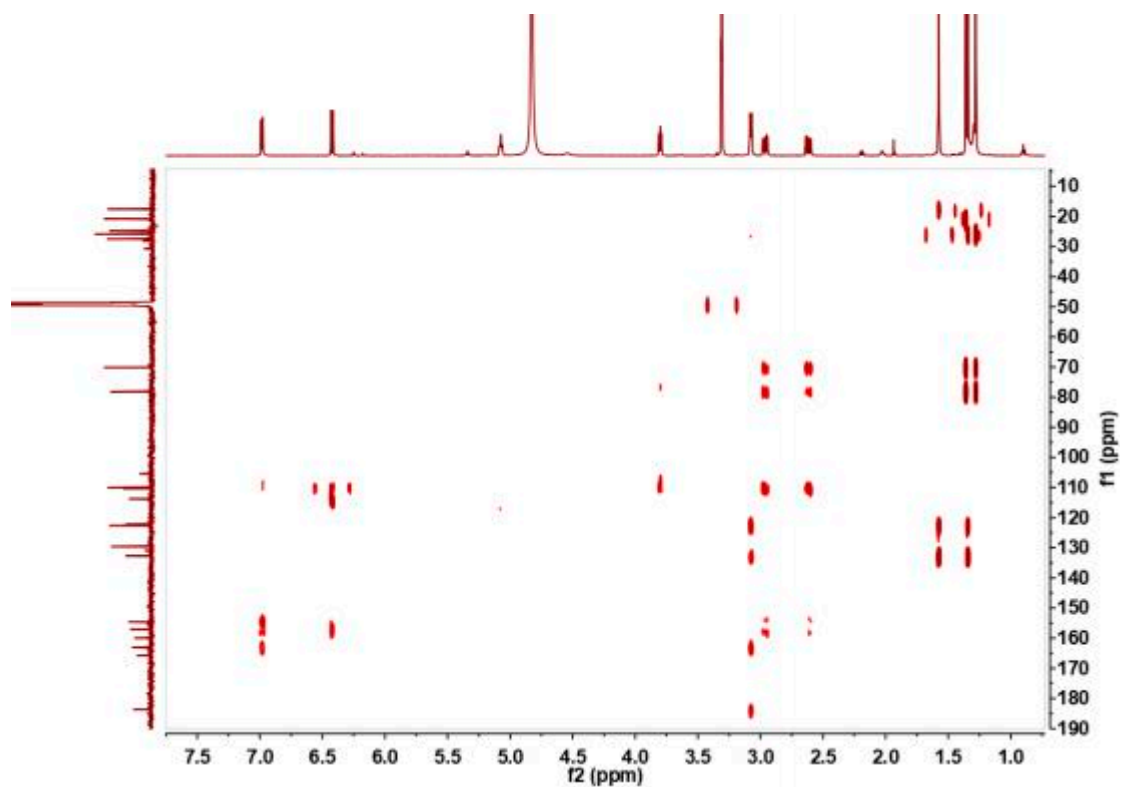

Figure S21. HMBC spectrum of compound 12 in CD<sub>3</sub>OD.

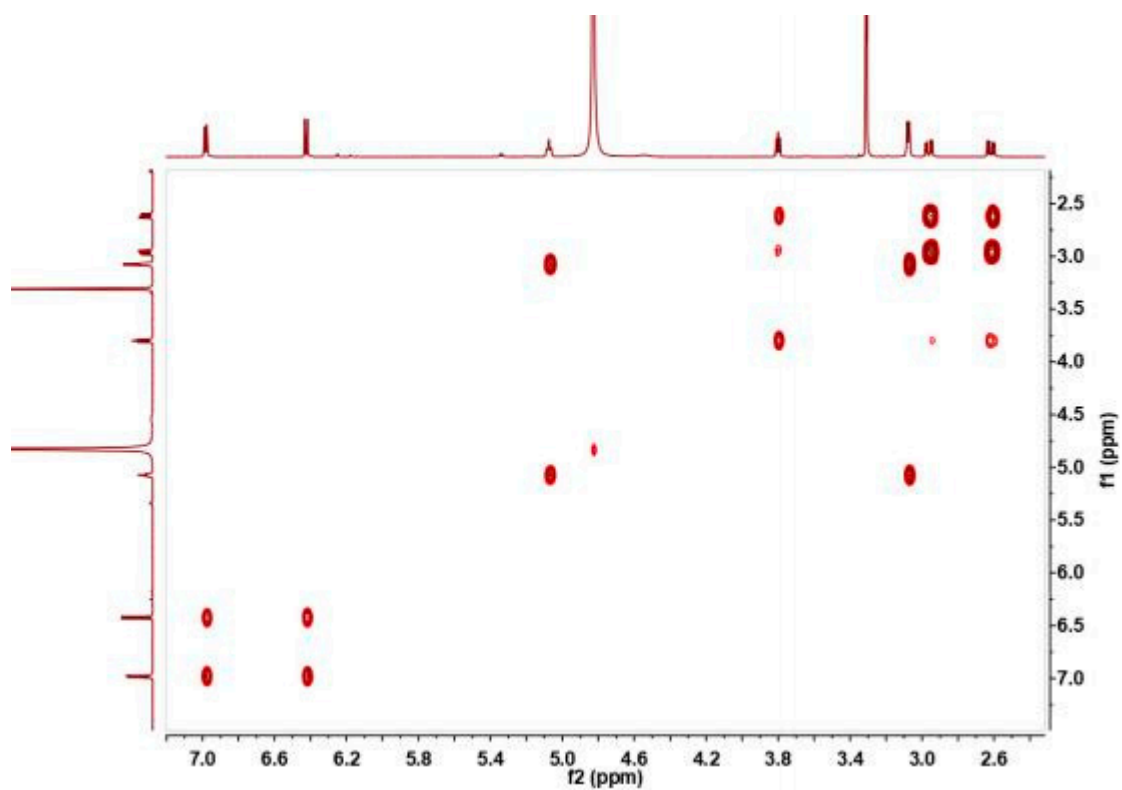

Figure S22. <sup>1</sup>H-<sup>1</sup>H COSY spectrum of compound 12 in CD<sub>3</sub>OD.

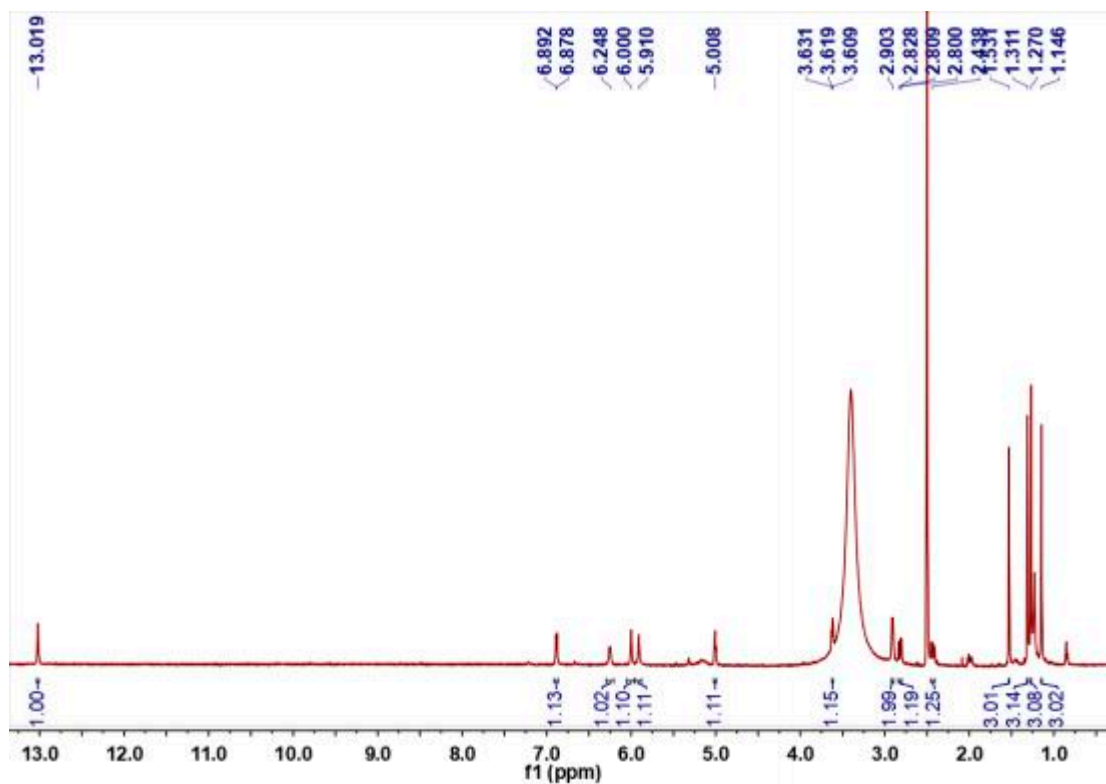

Figure S23. <sup>1</sup>H-NMR spectrum (600 MHz, DMSO) of compound 12.

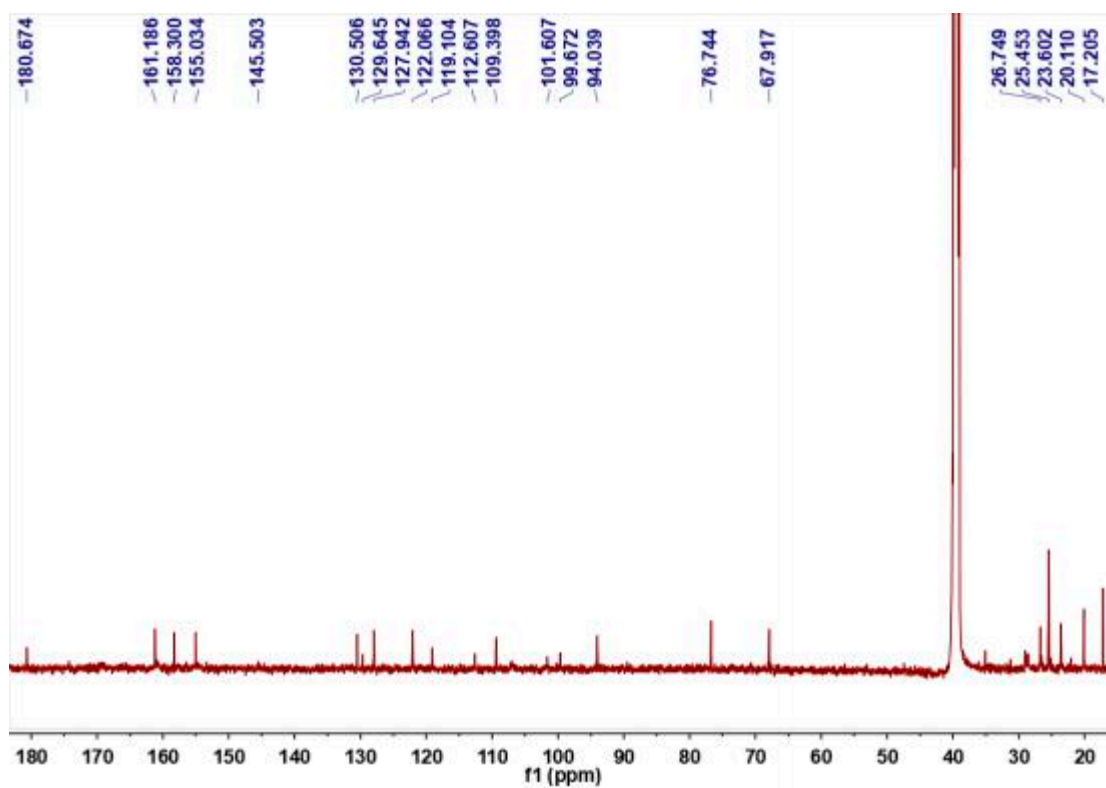

Figure S24. <sup>13</sup>C-NMR (150 MHz, DMSO) spectrum of compound 12.

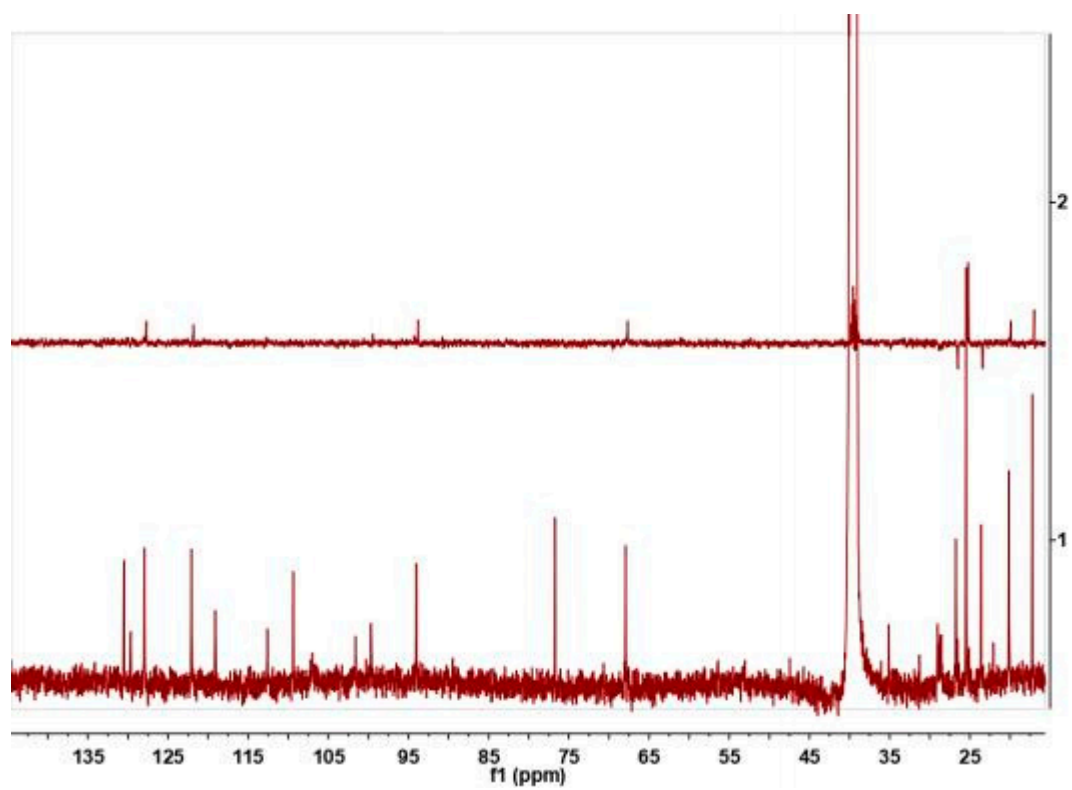

**Figure S25.** DEPT 135 spectrum (150 MHz, DMSO) of compound **12**.
